# The Complete Mitochondrial Genome of the Onychophoran *Epiperipatus biolleyi* Reveals a Unique Transfer RNA Set and Provides Further Support for the Ecdysozoa Hypothesis

Lars Podsiadlowski,\* Anke Braband,† and Georg Mayer‡

\*Institute of Biology, Freie Universität Berlin, Berlin, Germany; †Institute of Biology, Humboldt Universität zu Berlin, Berlin, Germany; and ‡Department of Anatomy and Cell Biology, University of Melbourne, Victoria, Australia

Onychophora (velvet worms) play a crucial role in current discussions on position of arthropods. The ongoing Articulata/Ecdysozoa debate is in need of additional ground pattern characters for Panarthropoda (Arthropoda, Tardigrada, and Onychophora). Hence, Onychophora is an important outgroup taxon in resolving the relationships among arthropods, irrespective of whether morphological or molecular data are used. To date, there has been a noticeable lack of mitochondrial genome data from onychophorans. Here, we present the first complete mitochondrial genome sequence of an onychophoran, *Epiperipatus biolleyi* (Peripatidae), which shows several characteristic features. Specifically, the gene order is considerably different from that in other arthropods and other bilaterians. In addition, there is a lack of 9 tRNA genes usually present in bilaterian mitochondrial genomes. All these missing tRNAs have anticodon sequences corresponding to 4-fold degenerate codons, whereas the persisting 13 tRNAs all have anticodons pairing with 2-fold degenerate codons. Sequence-based phylogenetic analysis of the mitochondrial protein-coding genes provides a robust support for a clade consisting of Onychophora, Priapulida, and Arthropoda, which confirms the Ecdysozoa hypothesis. However, resolution of the internal ecdysozoan relationships suffers from a cluster of long-branching taxa (including Nematoda and Platyhelminthes) and a lack of data from Tardigrada and further nemathelminth taxa in addition to nematodes and priapulids.

## Introduction

Onychophorans are a small group of terrestrial invertebrates, which are predominantly found in soil, leaf litter, or rotten wood, and show a disjunct distribution dating back to the Gondwana landmass (Brinck 1957; Monge-Najera 1995; Reid 1996). Together with Tardigrada (water bears), Onychophora are commonly regarded as the next relatives of Arthropoda (Chelicerata, Myriapoda, Crustacea, and Hexapoda) (Giribet et al. 2001; Nielsen 2001; Kusche et al. 2002; Mayer et al. 2004; Regier et al. 2005; Vitkova et al. 2005; Hejnol and Schnabel 2006). However, there are alternative views placing Onychophora close to Chelicerata (Ballard et al. 1992; Strausfeld et al. 2006) or uniting Tardigrada and Nematoda (Park et al. 2006).

Traditionally, the onychophoran body plan has been regarded as a mosaic of anatomical characters found in both annelids and arthropods (Snodgrass 1938; Storch and Ruhberg 1993; Nielsen 1998). The study of onychophorans, therefore, might yield valuable information for resolving the persisting Articulata/Ecdysozoa controversy (Scholtz 2002; Giribet 2003; Jenner and Scholtz 2005; Philippe et al. 2005; Pilato et al. 2005; Mayer 2006a; Schmidt-Rhaesa 2006). One of the major implications of the Ecdysozoa hypothesis is that the “annelid-like” characters of onychophorans must represent homoplasies, that is, either convergent features of Onychophora and Annelida or ancestral features of protostomes or even bilaterians. Recent anatomical and embryological studies have shown that some of the major putative correspondences between Onychophora and Annelida are ambiguous and, accordingly, do not support the monophyly of Articulata (Mayer 2006a). Moreover, re-

cent insights into the onychophoran head development (Eriksson and Budd 2000; Eriksson et al. 2003) and extensive paleontological record (Whittington 1978; Ramsköld and Chen 1998; Bergström and Hou 2001; Budd 2003; Maas et al. Forthcoming 2007) are better compatible with the Ecdysozoa hypothesis rather than with the Articulata concept (Giribet 2003). Nevertheless, additional approaches are required to further clarify and improve our understanding of arthropod evolution.

To date, the study of mitochondrial genomes has yielded significant insights into the evolution of major metazoan groups and their genomes (Boore 1999; Helfenbein and Boore 2004; Papillon et al. 2004; Valles and Boore 2006). Besides the sequence information, the mitochondrial gene order provides a useful character set for phylogenetic implications (Boore et al. 1995). Despite an extreme genome shuffling in some taxa (Machida et al. 2002), the identification of specific gene rearrangements in the mitochondrial genomes has led to a robust support of hitherto uncertain groupings and the establishment of novel sister-group relationships (e.g., Boore et al. 1998).

In contrast to the wealth of mitochondrial genomic data from various arthropods, only a small subset of mitochondrial genes has been scrutinized from Onychophora (Boore et al. 1995, 1998; Gleeson et al. 1998; Trewick 2000). Phylogenetic analyses of large data sets on the position of Arthropoda within Bilateria, thus, either are restricted to other data sources (Giribet et al. 2001; Mallatt et al. 2004; Mallatt and Giribet 2006) or exclude the Onychophora (Webster et al. 2006). In order to close this gap and to understand how the onychophoran mitochondrial genome compares to that of other arthropods and bilaterians, we sequenced the complete mitochondrial DNA from *Epiperipatus biolleyi* (Onychophora, Peripatidae). Here, we compare the onychophoran mitochondrial gene order with that in other Bilateria and perform a sequence-based phylogenetic analysis, which contributes to the ongoing Articulata/Ecdysozoa debate.

Key words: Onychophora, mitochondrial genome, mitochondrial gene order, tRNA import, Arthropoda.

E-mail: lars@podsiadlowski.de.

*Mol. Biol. Evol.* 25(1):42–51, 2008

doi:10.1093/molbev/msm223

Advance Access publication October 13, 2007

**Table 1**  
**PCR Primer Sequences and Corresponding Annealing Temperatures**

| Primer Name | Primer Sequence (5'–3')       | Temperature (°C) | Reference                             |
|-------------|-------------------------------|------------------|---------------------------------------|
| Crust-12f   | CAGCAKYCGGGTTAKAC             | 45               | Podsiadlowski and Bartolomaeus (2005) |
| Crust-12sr  | ACACCTACTWTGTTACGACTTATCTC    | 45               | Podsiadlowski and Bartolomaeus (2005) |
| Crust-nd4f  | TTGAGGTTAYCAGCCYG             | 50               | Podsiadlowski and Bartolomaeus (2005) |
| Crust-nd4r  | ATATGAGCYACAGAAGARTAAGC       | 50               | Podsiadlowski and Bartolomaeus (2005) |
| L329-ND2    | GGWGHGCHCCNTTWCATTTTTG        | 45               | Yamauchi et al. (2004)                |
| H1410-ND2   | AGTGCCWACTATWCCWGMTC          | 45               | Yamauchi et al. (2004)                |
| L1384-CO1   | GGTCAACAAATCATAAAGATATTGG     | 45               | Yamauchi et al. (2004)                |
| H2043-CO1   | TAAACTTCAGGGTGACCAAAAAATCA    | 45               | Yamauchi et al. (2004)                |
| L1564-CO1   | ATGGTATACCGATTWTRATTGG        | 45               | Yamauchi et al. (2004)                |
| H2619-CO1   | GGTATWCCWGCKAGWCCTAAGAAATGTTG | 45               | Yamauchi et al. (2004)                |
| L3020-CO2   | ATTTTTTYCATGAYCATGC           | 45               | Yamauchi et al. (2004)                |
| H3514-CO2   | CCACAAATTTCKGAACATTGWCCATAAAA | 45               | Yamauchi et al. (2004)                |
| L3542-CO2   | GGNCAATGTTTCAGAAATTTGTGG      | 45               | Yamauchi et al. (2004)                |
| H4375-A6    | GCDATCATGTTDGDGCDGMWAGTCG     | 45               | Yamauchi et al. (2004)                |
| L4672-CO3   | GGWCTWGTBAAATGGTTTCA          | 45               | Yamauchi et al. (2004)                |
| H5244S-CO3  | GCTTCAAAATCCWAMGTGGTG         | 45               | Yamauchi et al. (2004)                |
| L11197-ND1  | GCTAGATATATHAGTTTGTCCATADCG   | 45               | Yamauchi et al. (2004)                |
| H11892-ND1  | GGWTATATTCAGATTCGWAAAGGGDCC   | 45               | Yamauchi et al. (2004)                |
| L10061-CYB  | GGATTWTTTTAGCKATRCATTACAC     | 45               | Yamauchi et al. (2004)                |
| H-10699-CYB | GCAAATAGAAAATATCATTCWGGTTG    | 45               | Yamauchi et al. (2004)                |
| L12167S-16S | CGGTCTGAACCTCAGATCATG         | 45               | Yamauchi et al. (2004)                |
| H12663-16S  | CGCCTGTTTACCAAAAAACAT         | 45               | Yamauchi et al. (2004)                |
| Ebio-cox1f  | GTTGTTGCTATCTCTGCCTGTGTTGG    | 55               | This study                            |
| Ebio-cox2r  | AAACAGGTAATACCGTTCAAAATCATCT  | 55               | This study                            |
| Ebio-cox2f  | GGTGAATCCGTTTGTAGATGTTG       | 55               | This study                            |
| Ebio-cox2r  | GGGCTAATCTACTATGAAAAAAG       | 55               | This study                            |
| Ebio-cox3f  | AGGAAATTATATTCAGGGAGTTCA      | 54               | This study                            |
| Ebio-cobf   | ATTGCCAATCCAAAGCACC           | 54               | This study                            |
| Ebio.cobr   | TTTGGAACTAATAATGTGATACCAAGTA  | 56               | This study                            |
| Ebio-nad1r  | TGAATTCGTGGTTCATATCC          | 54               | This study                            |
| Ebio-nad1f  | GATAATAAGATAAGGGCGAGAC        | 54               | This study                            |
| Ebio-12Sf   | AAAAATCAAGATAAGTCGTAACATAGT   | 54               | This study                            |
| Ebio-12Sr   | GAGGAAATGCCATATCAGGTGC        | 54               | This study                            |
| Ebio-cox1r  | AAATTCCTTTGTAAGTTAATACCGT     | 54               | This study                            |

NOTE.—All primer pairs that were used to amplify fragments of the mitochondrial genome of *Epiperipatus biolleyi* (Onychophora, Peripatidae) are listed. Long PCR products were sequenced using a primer walking strategy.

## Materials and Methods

### Animals, DNA Extraction, Polymerase Chain Reaction, and Sequencing

A specimen of *E. biolleyi* (Bouvier 1902) was obtained from cultures established by one of the authors (G.M.). The original specimens were collected as described previously (Mayer 2006b). DNA was extracted with the DNeasy tissue kit (Qiagen, Hilden, Germany) following manufacturers protocols. Initial polymerase chain reaction (PCR) was done with Eppendorf HotMaster *Taq* using short-range primer pairs crust-nd4f/r, crust-12Sf/r, S6(nad2), S8(cox1), S10(cox1), S13(cox2), S15(cox2/ atp6), S18(cox3), S24(nad3–nad5), S38(cob), S41(nad1), S43(rrnL), and S48(rrnS) of previously described primer sets (Yamauchi et al. 2004; Podsiadlowski and Bartolomaeus 2005). Primer sequences and corresponding annealing temperatures are provided in table 1. PCR conditions: initial denaturation (94 °C, 1 min) was followed by 40 cycles of denaturation (94 °C, 30 s), primer annealing (45–50 °C, 30 s), and elongation (68 °C, 90 s). PCR was completed by final elongation (68 °C, 90 s). After sequencing of these initial PCR products, species-specific primer pairs were designed and combined in various ways to obtain PCR products bridging the gaps, thereby using Takara LA

*Taq* (TaKaRa) and a protocol for a long range PCR; initial denaturation (94 °C, 1 min) was followed by 40 cycles of denaturation (94 °C, 30 s), primer annealing (50–55 °C, 30 s), and elongation (65 °C, 7 min). PCR was completed by final elongation (65 °C, 3 min). Resulting long PCR products were sequenced by a primer walking strategy. All sequencing was done using a Beckman–Coulter CEQ 8000 capillary sequencer and the DTCS quick start kit (Beckman–Coulter, Fullerton, CA). Sequences were analyzed and assembled using CEQ software and Bioedit (Hall 1999). Identity of protein-coding and rRNA genes was confirmed by Blast searches and by comparison with arthropod gene alignments. The tRNA search was carried out with tRNAscan-SE (Lowe and Eddy 1997) and by eye inspection of otherwise “noncoding” sequences.

### Phylogenetic Analysis

Phylogenetic analysis was performed to clarify the position of Onychophora among Bilateria. Amino acid sequences from 11 protein-coding genes (all excepting *atp8* and *nad4L*, which have the shortest and highly divergent sequences) of several metazoan taxa (table 2) were aligned using ClustalW (Thompson et al. 1994), as implemented in

**Table 2**  
**Taxa Used in the Phylogenetic Analysis, Their Taxonomy and GenBank Accession Numbers**

| Species                          | Phylogenetic Position     | Accession Number |
|----------------------------------|---------------------------|------------------|
| <i>Epiperipatus biolleyi</i>     | Onychophora–Peripatidae   | NC_009082        |
| <i>Limulus polyphemus</i>        | Chelicerata–Xiphosura     | NC_003057        |
| <i>Heptathela hangzhouensis</i>  | Chelicerata–Araneae       | NC_005924        |
| <i>Ixodes hexagonus</i>          | Chelicerata–Acari         | NC_002010        |
| <i>Centruroides limpidus</i>     | Chelicerata–Scorpiones    | NC_006896        |
| <i>Nymphon gracile</i>           | Chelicerata–Pycnogonida   | NC_008572        |
| <i>Scutigera causeyae</i>        | Myriapoda–Symphyla        | NC_008453        |
| <i>Scutigera coleoptrata</i>     | Myriapoda–Chilopoda       | NC_005870        |
| <i>Lithobius forficatus</i>      | Myriapoda–Chilopoda       | NC_002629        |
| <i>Narceus annularis</i>         | Myriapoda–Diplopoda       | NC_003343        |
| <i>Thyropygus sp.-DVL2001</i>    | Myriapoda–Diplopoda       | NC_003344        |
| <i>Tricholepidion gertschi</i>   | Hexapoda–Zygentoma        | NC_005437        |
| <i>Petrobius brevistylis</i>     | Hexapoda–Archaeognatha    | NC_007689        |
| <i>Pollicipes polymerus</i>      | Crustacea–Cirripedia      | NC_005936        |
| <i>Daphnia pulex</i>             | Crustacea–Phyllopoda      | NC_000844        |
| <i>Triops cancriformis</i>       | Crustacea–Phyllopoda      | NC_004465        |
| <i>Penaeus monodon</i>           | Crustacea–Decapoda        | NC_002184        |
| <i>Squilla empusa</i>            | Crustacea–Stomatopoda     | NC_007444        |
| <i>Priapulid caudatus</i>        | Priapulida                | NC_008557        |
| <i>Cephalothrix rufifrons</i>    | Nemertea                  | EF140788         |
| <i>Phoronis psammophila</i>      | Phoronida                 | AY368231         |
| <i>Terebratulina retusa</i>      | Brachiopoda               | NC_000941        |
| <i>Haliotis rubra</i>            | Mollusca–Gastropoda       | NC_005940        |
| <i>Katharina tunicata</i>        | Mollusca–Polyplacophora   | NC_001636        |
| <i>Lumbricus terrestris</i>      | Annelida–Clitellata       | NC_001677        |
| <i>Platynereis dumerilii</i>     | Annelida–Polychaeta       | NC_000931        |
| <i>Urechis caupo</i>             | Annelida–Echiura          | NC_006379        |
| <i>Flustrellidra hispida</i>     | Bryozoa                   | NC_008192        |
| <i>Paraspadella gotoi</i>        | Chaetognatha              | NC_006083        |
| <i>Ascaris suum</i>              | Nematoda                  | NC_001327        |
| <i>Caenorhabditis elegans</i>    | Nematoda                  | NC_001328        |
| <i>Trichinella spiralis</i>      | Nematoda                  | NC_002681        |
| <i>Paratomella rubra</i>         | Platyhelminthes–Acoela    | AY228758         |
| <i>Fasciola hepatica</i>         | Platyhelminthes–Trematoda | NC_002546        |
| <i>Paragonimus</i>               | Platyhelminthes–Trematoda | NC_002354        |
| <i>Taenia solium</i>             | Platyhelminthes–Cestoda   | NC_004022        |
| <i>Leptorhynchoides thecatus</i> | Acanthocephala            | NC_006892        |
| <i>Balanoglossus carnosus</i>    | Enteropneusta             | NC_001887        |
| <i>Saccoglossus kowalevskii</i>  | Enteropneusta             | NC_007438        |
| <i>Florumetra serratissima</i>   | Echinodermata–Crinoidea   | NC_001878        |
| <i>Paracentrotus lividus</i>     | Echinodermata–Echinoidea  | NC_001572        |
| <i>Branchiostoma lanceolatum</i> | Chordata–Acrania          | NC_001912        |
| <i>Xenoturbella bocki</i>        | Xenoturbellida            | NC_008556        |
| <i>Acropora tenuis</i>           | Cnidaria–Anthozoa         | NC_003522        |
| <i>Metridium senile</i>          | Cnidaria–Anthozoa         | NC_000933        |

Bioedit version 7.01 (Hall 1999), under default settings. Ambiguously aligned regions were omitted using Gblocks version 0.91b (Castresana 2000), using default settings, except for changing “allowed gap positions” to “with half.”

Maximum parsimony (MP) analysis was performed with PAUP\* version 4.0b10 (Swofford 1993), 1,000 bootstrap replicates were performed, each with 10 replicates with random addition of taxa. Maximum likelihood (ML) analysis was done with Treefinder (Jobb 2007). We performed 10 different analyses with random taxon order for obtaining the best tree and, in addition, 100 bootstrap replicates. Model selection was done with Prottest version 1.3 (Abascal et al. 2005). According to the Akaike information criterion, the mtArt + G + I model performed best and was chosen for ML analysis. Bayesian inference (BI) was done with MrBayes version 3.1.2 (Huelsenbeck and Ronquist 2001). As the mtArt model is not imple-

mented in this software, we used the second best scoring model, mtRev + G + I for the Bayesian analysis. BI was run with 8 chains of 1,000,000 generations, sampling a tree every 1,000 generations; the first 200 trees were omitted as burn-in and the remaining 800 were used to calculate Bayesian posterior probabilities (BPP).

## Results and Discussion

### Organization of the Mitochondrial Genome

The complete mitochondrial genome of *E. biolleyi* (GenBank accession number: DQ666064) consists of 14,411 bp and contains genes for 13 protein subunits and 2 ribosomal RNAs, as is usual for most bilaterian animals, whereas only 13 tRNA genes are present (fig. 1; table 3). The major noncoding region (ncr), the putative mitochondrial control region, is located between *trnK* and *trnL*. Genes are encoded on both strands. Nucleotide composition analysis of single genes reveals a strand bias (positive CG skew on [+] strand genes and negative CG skew for [–] strand genes, table 3), similar to that found in most other mitochondrial genomes of arthropods (Hassanin 2006). The onychophoran mtDNA shows only few correspondences to the gene order of the putative basal pattern in Arthropoda (Staton et al. 1997), which is represented by the mitochondrial genome of *Limulus polyphemus* (fig. 2). The priapulid mitochondrial gene order is very similar to the arthropod ground pattern because only 1 large inversion distinguishes the 2 gene orders (Webster et al. 2006), giving further support for the *Limulus* pattern as putative arthropod ground pattern. Like in arthropods, priapulids, and nematodes (Boore 1999; Webster et al. 2006), but in contrast to annelids (Valles and Boore 2006), protein-coding genes are found encoded on both strands of the mitochondrial genome in *E. biolleyi*. Compared with *L. polyphemus*, the protein-coding genes *nad5*, *nad4*, *nad4L*, *cob*, and *nad6*, as well as the ribosomal gene *rrnL* are found at deviating positions and on the opposite strand. Furthermore, the mitochondrial control region (ncr) and 11 out of 13 tRNA genes are located at relative positions different from those in *L. polyphemus* (fig. 2).

Of outstanding interest is the position of the genes *trnL(UUR)* and *nad1* in the onychophoran mtDNA, which are adjacent to each other (figs. 1 and 2). Because the same arrangement is also found in Myriapoda, Chelicerata, Tardigrada, Annelida, Echiura, and Mollusca (Boore et al. 1995, 1998), this pattern most likely represents an ancestral feature (plesiomorphy) of Panarthropoda. This is in contrast to Crustacea and Hexapoda, in which *trnL(UUR)* is placed between *cox1* and *cox2*. Our data, accordingly, confirm a previous conclusion that the position of *trnL(UUR)* between *cox1* and *cox2* represents a derived feature (autapomorphy) supporting the monophyly of Pancrustacea (Tetraconata), a taxon uniting Crustacea and Hexapoda (Boore et al. 1998) to the exclusion of Chelicerata and Myriapoda.

Although the mitochondrial gene order varies among multicellular animals and within single bilaterian taxa (e.g., Mollusca, see (Dreyer and Steiner 2004; Akasaki et al. 2006; Valles and Boore 2006), constant relative positions



**Table 3**  
**Organization of the Mitochondrial Genome of *Epiperipatus biolleyi* (Onychophora, Peripatidae)**

| Gene             | Strand | Position Number        | Size (nt) | CG-Skew | Start Codon | Stop Codon | Intergenic Nucleotides |
|------------------|--------|------------------------|-----------|---------|-------------|------------|------------------------|
| <i>trnI</i>      | –      | 1–48                   | 48        |         |             |            | 17                     |
| <i>trnF</i>      | –      | 66–134                 | 69        |         |             |            | –2                     |
| <i>trnY</i>      | –      | 133–197                | 65        |         |             |            | 6                      |
| <i>trnN</i>      | +      | 204–263                | 60        |         |             |            | 18                     |
| <i>nad6</i>      | –      | 282–788                | 507       | –0.278  | ATG         | TAA        | a                      |
| <i>rrnS</i>      | –      | 789–1392 <sup>a</sup>  | 604       | –0.133  |             |            | a                      |
| <i>rrnL</i>      | +      | 1393–2597 <sup>a</sup> | 1,205     | 0.698   |             |            | a                      |
| <i>nad4L</i>     | +      | 2598–2888              | 291       | 0.530   | ATG         | TAG        | 0                      |
| <i>nad4</i>      | +      | 2889–4244              | 1,356     | 0.373   | ATG         | TAG        | 28                     |
| <i>trnW</i>      | –      | 4273–4338              | 66        |         |             |            | 30                     |
| <i>trnQ</i>      | –      | 4369–4427              | 59        |         |             |            | –7                     |
| <i>nad2</i>      | +      | 4421–5422              | 1,002     | 0.598   | ATG         | TAA        | 0                      |
| <i>cox1</i>      | +      | 5423–6952              | 1,530     | 0.291   | ATG         | TAA        | 1                      |
| <i>cox2</i>      | +      | 6954–7631              | 678       | 0.371   | ATG         | TAA        | 43                     |
| <i>atp8</i>      | +      | 7675–7833              | 159       | 0.419   | ATT         | TAA        | –7                     |
| <i>atp6</i>      | +      | 7827–8504              | 678       | 0.326   | ATG         | TAA        | –1                     |
| <i>cox3</i>      | +      | 8504–9289              | 786       | 0.301   | ATG         | TAA        | 1                      |
| <i>nad3</i>      | +      | 9291–9642              | 352       | 0.357   | ATG         | T–         | 18                     |
| <i>trnM</i>      | +      | 9661–9720              | 60        |         |             |            | 10                     |
| <i>cob</i>       | –      | 9731–10870             | 1,140     | –0.274  | ATG         | TAA        | 2                      |
| <i>nad1</i>      | –      | 10873–11799            | 927       | –0.225  | ATA         | TAA        | –24                    |
| <i>trnL(UUR)</i> | –      | 11776–11845            | 70        |         |             |            | 9                      |
| <i>trnC</i>      | +      | 11855–11916            | 62        |         |             |            | 0                      |
| <i>trnH</i>      | +      | 11917–11976            | 60        |         |             |            | 16                     |
| <i>nad5</i>      | +      | 11993–13672            | 1,713     | 0.320   | ATG         | TAG        | –6                     |
| <i>trnE</i>      | –      | 13667–13718            | 52        |         |             |            | 6                      |
| <i>trnD</i>      | +      | 13725–13792            | 68        |         |             |            | 16                     |
| <i>trnK</i>      | +      | 13809–13871            | 63        |         |             |            | 540                    |
| Noncoding        |        | 13872–14411            | 540       |         |             |            |                        |

<sup>a</sup> Start and end positions of rRNA genes not determinable by sequence data alone.

of certain protein-coding and ribosomal genes are found throughout a wide range of animal groups. For example, a block of *nad5*, *nad4*, and *nad4L*, coding on the same strand (sometimes interrupted by tRNA genes, fig. 2), is found in organisms as diverse as arthropods (Staton et al. 1997), molluscs (Boore and Brown 1994), brachiopods (Helfenbein et al. 2001), nematodes (Lavrov and Brown 2001), priapulids (Webster et al. 2006, 2007), and most deuterostomes (Boore 1999). Due to its conserved nature, this pattern might have been inherited from a common bilaterian ancestor. The same holds true for a block consisting of *cox1*, *cox2*, *atp8*, *atp6*, and *cox3*, all coding on the same strand and for adjacent *nad6* and *cob* on the same strand (with the exception of Deuterostomia) and adjacent *rrnL* and *rrnS* on the same strand (fig. 2). However, in *E. biolleyi* 3 of these 4 conserved blocks of adjacent genes are disrupted by other protein-coding and rRNA genes (figs. 1 and 2). Regarding all the mentioned outgroup taxa, we suggest that most (if not all) changes in the gene order of this species are specific to Onychophora or at least to an onychophoran subtaxon including *E. biolleyi*. The greatly modified arrangement of the mitochondrial genes in *E. biolleyi*, thus, does not reflect the overall conservative nature of the onychophoran anatomy. However, studies on the mitochondrial genomes throughout the Onychophora might disclose a diversity of gene orders useful for phylogenetic considerations. Such diversity is likely because the major onychophoran subgroups have a long history and have been separated for at least 100 Myr since the breakup of Gondwana (Brinck 1957; Monge-Najera 1995; Reid 1996).

#### A Unique Set of Transfer RNA Genes

Although representatives of Porifera (Lavrov et al. 2005), Placozoa (Dellaporta et al. 2006), and Choanoflagellata (Burger et al. 2003) bear 24–25 tRNA species in their mitochondrial genomes, almost all other animals have a set of 22 tRNAs (fig. 3). Among these 22 tRNAs, 2 species (recognizing the codons UUR and CUN) transfer leucine and 2 species (recognizing AGN and UCN) transfer serine, whereas all the other amino acids are handled by only 1 tRNA species each. Only few metazoan taxa show less than 22 tRNA genes in their mitochondrial genomes. Chaetognatha and Cnidaria represent 2 extreme examples of tRNA gene reduction in their mtDNA because they retained only 1 (tRNA-Met; Helfenbein et al. 2004) or 2 tRNA species, (tRNA-Met and tRNA-Trp; Pont-Kingdon et al. 1998; Medina et al. 2006), respectively. A permanent import of the missing (but essential) tRNA molecules from the cytosol into the mitochondria must be assumed in each case of the tRNA reduction and, indeed, has been demonstrated in some plants (Dietrich et al. 1992; Delage et al. 2003).

Despite an extensive search with the tRNAscan-SE software (Lowe and Eddy 1997) and by eye inspection, we detected only 13 tRNA genes in the mitochondrial genome of *E. biolleyi* (figs. 3 and 4). Notably, all of the recognized tRNAs show anticodons corresponding to the 2-fold degenerate codons (2-tRNAs), whereas all the missing tRNA species would pair with the 4-fold degenerate codons (4-tRNAs). We exclude the possibility that the missing tRNA genes might be located on any additional

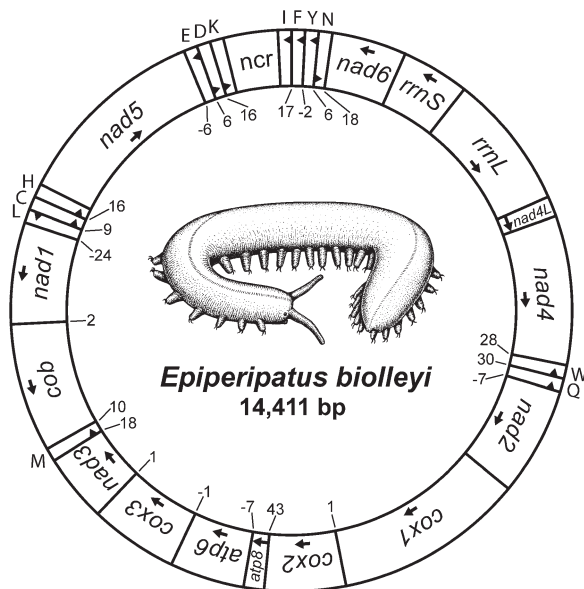

FIG. 1.—Organization of the mitochondrial genome of *Epipeperipatus biolleyi* (Onychophora, Peripatidae). Transfer RNA genes are depicted by their corresponding 1-letter amino acid code. Numbers at gene borders indicate the number of noncoding (positive values) or overlapping nucleotides (negative values) between 2 adjacent genes. Arrows and arrowheads indicate orientation of genes either on (+) strand (clockwise) or (–) strand (counterclockwise). Gene sizes only roughly approximated; ncr, noncoding or putative mitochondrial control region.

genomic elements in the mitochondria of *E. biolleyi*, for example, as described in the nematode *Globodera pallida* (Gibson et al. 2007). It is very unlikely that exactly this specific set of genes has been removed from the major mtDNA molecule by chance. Instead, we suggest that these genes

have been completely obliterated from the *E. biolleyi* mtDNA and are substituted by corresponding tRNAs encoded by nuclear DNA. In case of such complete reduction, the missing tRNA species have to be imported permanently from the cytosol into the mitochondria in order to facilitate the translation of essential proteins in these organelles.

The exclusive reduction of 4-tRNAs and the retention of a complete set of 2-tRNAs in the mtDNA of *E. biolleyi* (figs. 3 and 4) raise the fundamental question of whether there are any differences in the transmembrane transport or recognition mechanisms between the 2 tRNA groups. Because an accidental reduction of the one group and a simultaneous retention of the other seem unlikely, we suggest that there must be a distinguishing feature between them, although it has not been discovered yet. Detailed studies on the pathways of tRNA import mechanisms from the cytoplasm into the mitochondria are desirable to clarify this issue.

### Phylogenetic Analysis

We performed a phylogenetic analysis with concatenated amino acid sequences of 11 protein-coding genes from 43 bilaterian species and 2 cnidarians as an outgroup (fig. 5). In the resulting ML tree (the best tree from a likelihood analysis), Bilateria are divided into 4 large groups: 1) Deuterostomia + *Xenoturbella*, 2) Arthropoda + Onychophora + Priapulida (or Ecdysozoa, excluding Nematoda), 3) Annelida, Mollusca, Nemertea, Brachiopoda, and Phoronida (Lophotrochozoa, excluding Platyhelminthes and Acanthocephala), and 4) an assemblage of long-branching taxa (Platyhelminthes, Acanthocephala, Nematoda, Acoela, Chaetognatha, and Bryozoa). The monophyly of the first

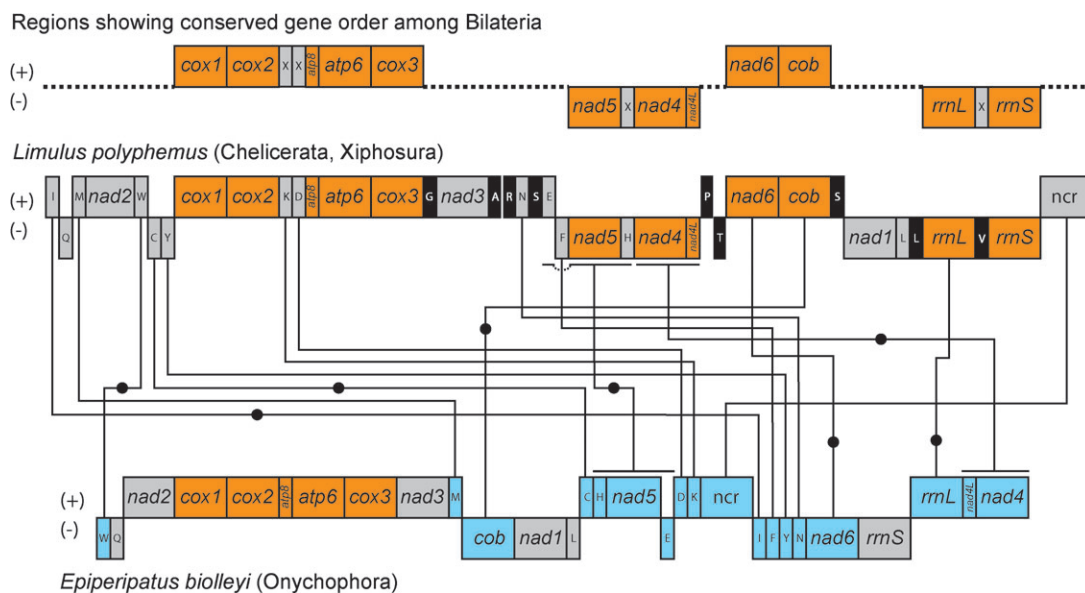

FIG. 2.—Comparison of linearized mitochondrial gene orders in Bilateria, Arthropoda, and *Epipeperipatus biolleyi* (Onychophora, Peripatidae). As a representative of the ground pattern of Arthropoda, the mitochondrial gene order of *Limulus polyphemus* (Chelicerata, Xiphosura) has been chosen (see text). Transfer RNA genes are depicted by their corresponding 1-letter amino acid code. Genes shaded in blue have different positions in *E. biolleyi* and *L. polyphemus*. Transfer RNA genes missing in *E. biolleyi* are shaded in black in *L. polyphemus*. Regions shaded in red indicate gene blocks that are conserved in many triploblastic animals and, thus, might represent the ground pattern of Bilateria. Black circles indicate switches in gene position between (+) and (–) mtDNA strands.

|   | U         | C         | A          | G         |
|---|-----------|-----------|------------|-----------|
| U | UUU Phe F | UCU Ser S | UAU Tyr Y  | UGU Cys C |
|   | UUC Phe F | UCC Ser S | UAC Tyr Y  | UGC Cys C |
|   | UUA Leu L | UCA Ser S | UAA stop * | UGA Trp W |
|   | UUG Leu L | UCG Ser S | UAG stop * | UGG Trp W |
| C | CUU Leu L | CCU Pro P | CAU His H  | CGU Arg R |
|   | CUC Leu L | CCC Pro P | CAC His H  | CGC Arg R |
|   | CUA Leu L | CCA Pro P | CAA Gln Q  | CGA Arg R |
|   | CUG Leu L | CCG Pro P | CAG Gln Q  | CGG Arg R |
| A | AUU Ile I | ACU Thr T | AAU Asn N  | AGU Ser S |
|   | AUC Ile I | ACU Thr T | AAC Asn N  | AGC Ser S |
|   | AUA Met M | ACA Thr T | AAA Lys K  | AGA Ser S |
|   | AUG Met M | ACG Thr T | AAG Lys K  | AGG Ser S |
| G | GUU Val V | GCU Ala A | GAU Asp D  | GGU Gly G |
|   | GUC Val V | GCC Ala A | GAC Asp D  | GGC Gly G |
|   | GUA Val V | GCA Ala A | GAA Glu E  | GGA Gly G |
|   | GUG Val V | GCG Ala A | GAG Glu E  | GGG Gly G |

FIG. 3.—Degenerate genetic code of the invertebrate mitochondrial DNA (code no. 5) and its coverage by the tRNA genes in *Epiperipatus biolleyi* (Onychophora, Peripatidae). Each codon is accompanied by its corresponding amino acid (depicted by a 3-letter code). Codons represented in black boxes lack a corresponding tRNA gene in the mitochondrial genome of *E. biolleyi*.

3 groups is in accordance with the most common view of the metazoan phylogeny, built upon the analyses of various molecular data sets (Halanych 2004; Philippe et al. 2005; Mallatt and Giribet 2006; Webster et al. 2007). The fourth group, however, might be an artificial assemblage due to the long-branch attraction. Especially Platyhelminthes, Acanthocephala, and Nematoda show branches, which are extremely long in comparison to the other lophotrochozoan or ecdysozoan taxa (fig. 5). Although some of these long-branching taxa are usually included into one of the large bilaterian groups (Platyhelminthes and Acanthocephala into Lophotrochozoa and Nematoda into Ecdysozoa) (Halanych 2004; Philippe et al. 2005; Mallatt and Giribet 2006), the phylogenetic positions of Bryozoa, Chaetognatha, and Acoela are still discussed controversially. As these taxa cannot be included in any of the major taxa with certainty, at least some of them might represent basal branches in the bilaterian tree (Haszprunar 1996; Ruiz-Trillo et al. 2002; Telford et al. 2003; Helfenbein et al. 2004; Papillon et al. 2004; Marletaz et al. 2006; Matus et al. 2006; Waeschenbach et al. 2006).

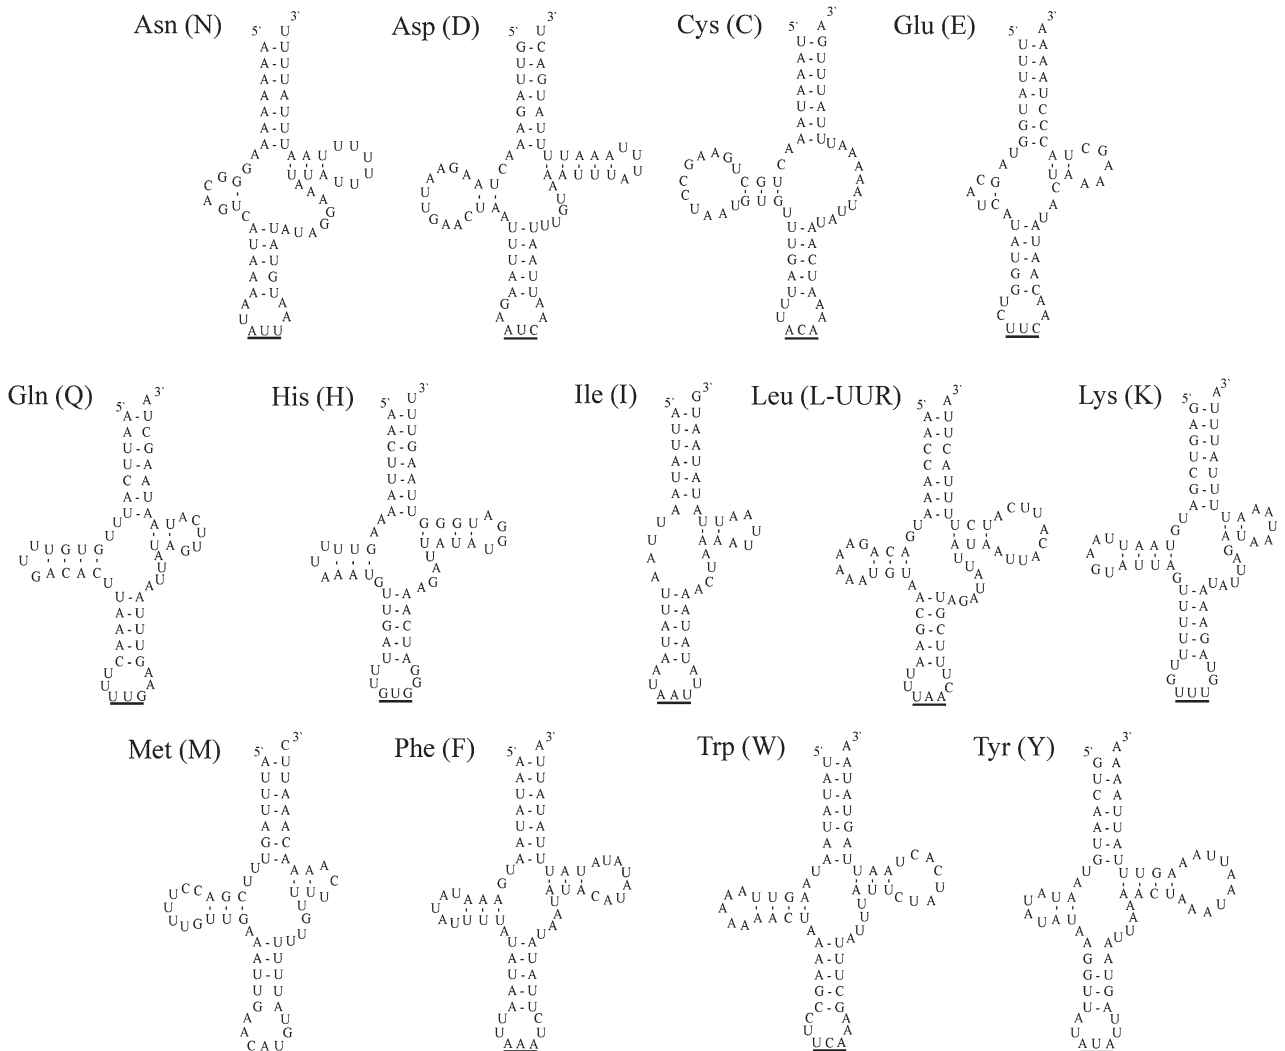

FIG. 4.—Plots of the putative secondary structures of mitochondrial transfer RNAs from *Epiperipatus biolleyi* (Onychophora, Peripatidae). Anticodon sequence is underlined.

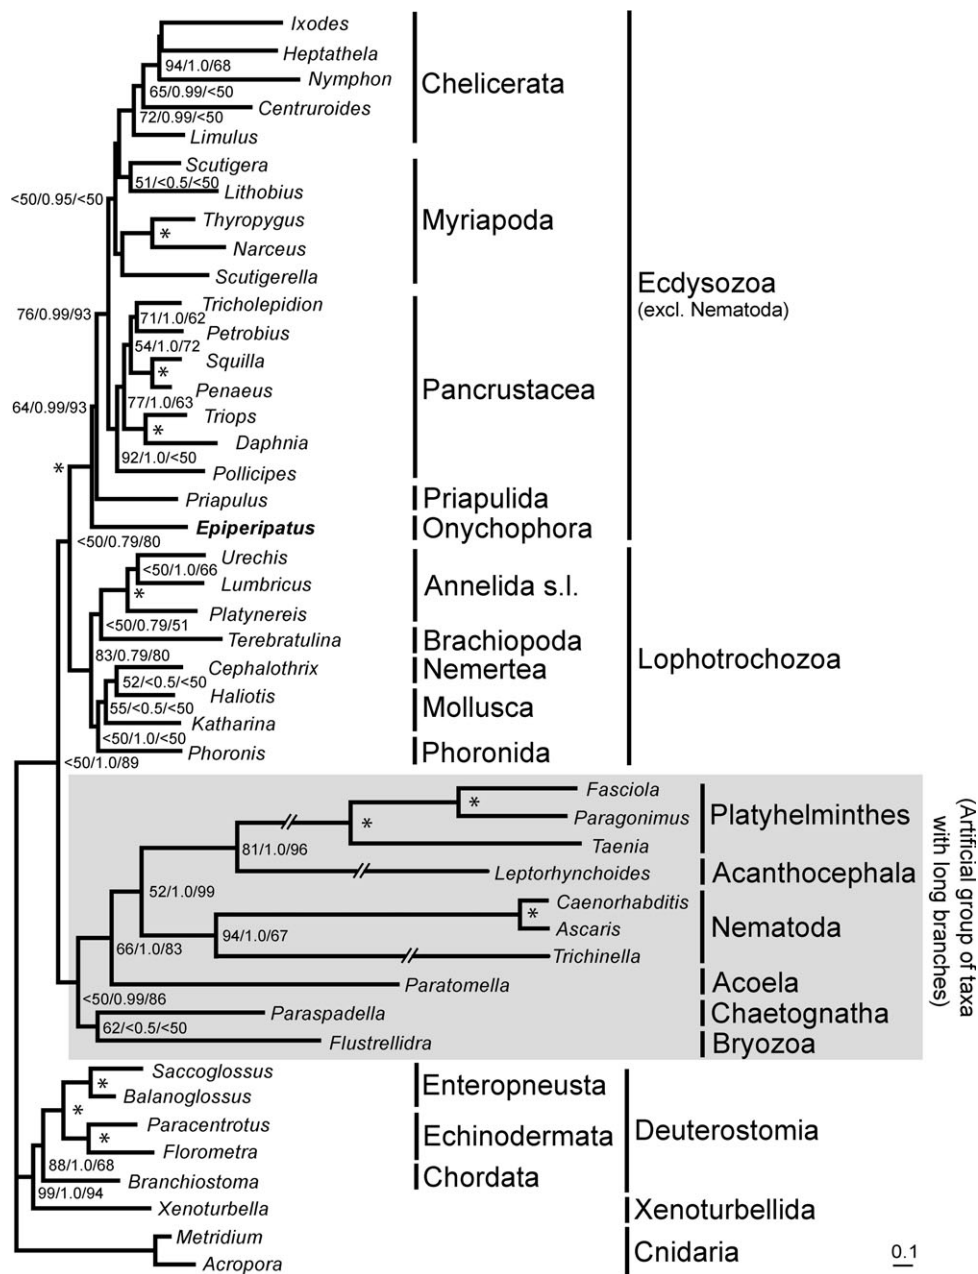

FIG. 5.—Bilaterian relationships: best tree from the ML analysis ( $-\ln = 90078$ ). Concatenated amino acid alignments from 11 protein-coding genes were used for the analysis (from *Paratomella* and *Cephalothrix*, only a subset of sequences was available; mtArt + G + I). Numbers next to nodes represent 1) support from ML bootstrapping (%), 2) BPP, and 3) Maximum Parsimony bootstrap percentage (from left to right); asterisks indicate that all 3 numbers have reached the maximum values (100/1.0/100). Branch lengths reflect substitutions per site (scale bar). See table 2 for full species names and GenBank accession numbers of sequence data.

The assemblage of Onychophora, Priapulida, and Arthropoda is strongly supported by high maximum likelihood bootstrap percentage (MLBP: 100) and maximum parsimony bootstrap percentage (MPBP: 100), as well as by high BPP (BPP: 1.0), whereas the sister group relationship between these 3 groups is unresolved. Furthermore, there is only a weak support for arthropod monophyly (MPBP: 76, BPP: 1.0, MPBP: <50), but there is no hint for an affinity of Onychophora to Chelicerata, as proposed recently on the basis of the brain anatomy (Strausfeld et al. 2006). Among arthropods, there is a good support for

a monophyletic Pancrustacea in both ML and BI analyses (MPBP: 92, BPP: 1.0, MPBP: <50), a moderate support for a monophyletic Chelicerata (MPBP: 72, BPP: 0.99, MPBP: <50), and no support for the monophyly of Myriapoda. The clustering of Myriapoda and Chelicerata only got support from BI (MPBP: <95, BPP: 0.95, MPBP: <50).

In summary, our data provide a robust support for a close relationship of onychophorans, arthropods, and priapulids. A close relationship of priapulids and arthropods has been demonstrated recently by an analysis of the mitochondrial gene order and by a phylogenetic analysis using



expressed sequence tag data from various eukaryotes (Webster et al. 2006, 2007). The inclusion of an onychophoran in our analysis of the mtDNA sequences did not improve the resolution within the Ecdysozoa, possibly because of a lack of data from Tardigrada, Nematomorpha, and other nemathelminth taxa. Moreover, the long branches of the nematode mitochondrial genomes led to an artificial position of Nematoda far away from the other ecdysozoan taxa. However, the placement of Onychophora close to arthropods indicates that the analyzed sequences of the protein-coding genes in *E. biolleyi* are less derived than the strongly rearranged mitochondrial gene order. An increased taxon sampling for Onychophora and other Ecdysozoa, therefore, might contribute to a better resolution of the basal arthropod and ecdysozoan relationships.

### Acknowledgments

The staff of the Instituto Nacional de Biodiversidad (INBio, Costa Rica) is gratefully acknowledged for providing collecting and export permits. G.M. is indebted to Alvaro Herrera (INBio) for his great help with collecting and hospitality. We thank Thomas Bartolomaeus and Gerhard Scholtz for providing research facilities and support throughout all stages of our work. Peter Adam prepared the line drawing of *E. biolleyi*. This research was supported by grants from the German Research Foundation (DFG): Ba 1520/10-1 (to L.P.) and Scho 442/8-2 (to A.B.), Priority Program 1174 “Deep Metazoan Phylogeny,” and a research grant Ma 4147/1-1 (to G.M.).

### Literature Cited

- Abascal F, Zardoya R, Posada D. 2005. ProtTest: selection of best-fit models of protein evolution. *Bioinformatics*. 21:2104–2105.
- Akasaki T, Nikaido M, Tsuchiya K, Segawa S, Hasegawa M, Okada N. 2006. Extensive mitochondrial gene arrangements in coleoid cephalopoda and their phylogenetic implications. *Mol Phylogenet Evol*. 38:648–658.
- Ballard JWO, Olsen GJ, Faith DP, Odgers WA, Rowell DM, Atkinson PW. 1992. Evidence from 12S ribosomal-RNA sequences that onychophorans are modified arthropods. *Science*. 258:1345–1348.
- Bergström J, Hou XG. 2001. Cambrian Onychophora or xenusians. *Zool Anz*. 240:237–245.
- Boore JL. 1999. Animal mitochondrial genomes. *Nucleic Acids Res*. 27:1767–1780.
- Boore JL, Brown WM. 1994. Complete DNA sequence of the mitochondrial genome of the black chiton, *Katharina tunicata*. *Genetics*. 138:423–443.
- Boore JL, Collins TM, Stanton D, Daehler LL, Brown WM. 1995. Deducing the pattern of arthropod phylogeny from mitochondrial DNA rearrangements. *Nature*. 376:163–165.
- Boore JL, Lavrov DV, Brown WM. 1998. Gene translocation links insects and crustaceans. *Nature*. 392:667–668.
- Brinck P. 1957. Onychophora, a review of South African species, with a discussion on the significance of the geographical distribution of the group. In: Hanström B, Brinck P, Rudebeck G, editors. *South African animal life*. Stockholm (Sweden): Almqvist & Wiksell. p. 7–32.
- Budd GE. 2003. Arthropods as ecdysozoans: the fossil evidence. In: Legakis A, Sfenthourakis S, Polymeni R, Thessalou-Leggaki M, editors. *The new panorama of animal evolution*. Proceedings of XVIII International Congress of Zoology, Athens (Greece): Pensoft Sofia. p. 479–487.
- Burger G, Forget L, Zhu Y, Gray MW, Lang BF. 2003. Unique mitochondrial genome architecture in unicellular relatives of animals. *Proc Natl Acad Sci U S A*. 100:892–897.
- Castresana J. 2000. Selection of conserved blocks from multiple alignments for their use in phylogenetic analysis. *Mol Biol Evol*. 17:540–552.
- Delage L, Dietrich A, Cosset A, Marechal-Drouard L. 2003. In vitro import of a nuclearly encoded tRNA into mitochondria of *Solanum tuberosum*. *Mol Cell Biol*. 23:4000–4012.
- Dellaporta SL, Xu A, Sagasser S, Jakob W, Moreno MA, Buss LW, Schierwater B. 2006. Mitochondrial genome of *Trichoplax adhaerens* supports placozoa as the basal lower metazoan phylum. *Proc Natl Acad Sci U S A*. 103:8751–8756.
- Dietrich A, Weil JH, Marechal-Drouard L. 1992. Nuclear-encoded transfer RNAs in plant mitochondria. *Annu Rev Cell Biol*. 8:115–131.
- Dreyer H, Steiner G. 2004. The complete sequence and gene organization of the mitochondrial genome of the gadilid scaphopod *Siphonodontium lobatum* (mollusca). *Mol Phylogenet Evol*. 31:605–617.
- Eriksson BJ, Budd GE. 2000. Onychophoran cephalic nerves and their bearing on our understanding of head segmentation and stem-group evolution of Arthropoda. *Arthropod Struct Dev*. 29:197–209.
- Eriksson BJ, Tait NN, Budd GE. 2003. Head development in the onychophoran *Euperipatoides kanangrensis* with particular reference to the central nervous system. *J Morphol*. 255:1–23.
- Gibson T, Blok VC, Phillips MS, Hong G, Kumarainghe D, Riley IT, Dowton M. 2007. The mitochondrial subgenomes of the nematode *Globodera pallida* are mosaics: evidence of recombination in an animal mitochondrial genome. *J Mol Evol*. 64:463–471.
- Giribet G. 2003. Molecules, development and fossils in the study of metazoan evolution; articulata versus ecdysozoa revisited. *Zoology*. 106:303–326.
- Giribet G, Edgecombe GD, Wheeler WC. 2001. Arthropod phylogeny based on eight molecular loci and morphology. *Nature*. 413:157–161.
- Gleeson DM, Rowell DM, Tait NN, Briscoe DA, Higgins AV. 1998. Phylogenetic relationships among Onychophora from Australasia inferred from the mitochondrial cytochrome oxidase subunit I gene. *Mol Phylogenet Evol*. 10:237–248.
- Halanych KM. 2004. The new view of animal phylogeny. *Annu Rev Ecol Evol Syst*. 35:229–256.
- Hall TA. 1999. BioEdit: a user-friendly biological sequence alignment editor and analysis program for Windows 95/98/NT. *Nucleic Acids Symp Ser*. 41:95–98.
- Hassanin A. 2006. Phylogeny of Arthropoda inferred from mitochondrial sequences: strategies for limiting the misleading effects of multiple changes in pattern and rates of substitution. *Mol Phylogenet Evol*. 38:100–116.
- Haszprunar G. 1996. Plathelminthes and plathelminthomorpha—paraphyletic taxa. *J Zool Syst Evol Res*. 34:41–47.
- Hejnol A, Schnabel R. 2006. What a couple of dimensions can do for you: comparative developmental studies using 4D microscopy—examples from tardigrade development. *Integr Comp Biol*. 46:151–161.
- Helfenbein KG, Boore JL. 2004. The mitochondrial genome of *Phoronis architecta*—comparisons demonstrate that phoronids are lophotrochozoan protostomes. *Mol Biol Evol*. 21:153–157.



- Helfenbein KG, Brown WM, Boore JL. 2001. The complete mitochondrial genome of the articulate brachiopod *Terebratalia transversa*. *Mol Biol Evol.* 18:1734–1744.
- Helfenbein KG, Fourcade HM, Vanjani RG, Boore JL. 2004. The mitochondrial genome of *Paraspadella gotoi* is highly reduced and reveals that chaetognaths are a sister group to protostomes. *Proc Natl Acad Sci U S A.* 101:10639–10643.
- Huelsenbeck JP, Ronquist F. 2001. MRBAYES: Bayesian inference of phylogenetic trees. *Bioinformatics.* 17:754–755.
- Jenner R, Scholtz G. 2005. Playing another round of metazoan phylogenetics: historical epistemology, sensitivity analysis, and the position of Arthropoda within the metazoa on the basis of morphology. In: Koenemann S, Jenner R, editors. *Crustacea and arthropod relationships*. Boca Raton (FL): CRC Press.
- Jobb G. 2007. Treefinder. Version of Feb. 2007 [Internet]. Munich (Germany): Distributed by the author. [cited]. Available from: [www.treefinder.de](http://www.treefinder.de). Accessed 25 Oct 2007.
- Kusche K, Ruhberg H, Burmester T. 2002. A hemocyanin from the Onychophora and the emergence of respiratory proteins. *Proc Natl Acad Sci U S A.* 99:10545–10548.
- Lavrov DV, Brown WM. 2001. *Trichinella spiralis* mtDNA: a nematode mitochondrial genome that encodes a putative ATP8 and normally structured tRNAs and has a gene arrangement relatable to those of coelomate metazoans. *Genetics.* 157:621–637.
- Lavrov DV, Forget L, Kelly M, Lang BF. 2005. Mitochondrial genomes of two demosponges provide insights into an early stage of animal evolution. *Mol Biol Evol.* 22:1231–1239.
- Lowe TM, Eddy SR. 1997. tRNAscan-SE: a program for improved detection of transfer RNA genes in genomic sequence. *Nucleic Acids Res.* 25:955–964.
- Maas A, Mayer G, Kristensen RM, Waloszek D. Forthcoming 2007. A Cambrian micro-lobodian and the evolution of arthropod locomotion and reproduction. *Chin Sci Bull.*
- Machida RJ, Miya MU, Nishida M, Nishida S. 2002. Complete mitochondrial DNA sequence of *Tigriopus japonicus* (crustacea: copepoda). *Mar Biotechnol.* 4:406–417.
- Mallatt J, Giribet G. 2006. Further use of nearly complete 28S and 18S rRNA genes to classify ecdysozoa: 37 more arthropods and a kinorhynch. *Mol Phylogenet Evol.* 40:772–794.
- Mallatt JM, Garey JR, Shultz JW. 2004. Ecdysozoan phylogeny and Bayesian inference: first use of nearly complete 28S and 18S rRNA gene sequences to classify the arthropods and their kin. *Mol Phylogenet Evol.* 31:178–191.
- Marletaz F, Martin E, Perez Y, et al. (12 co-authors). 2006. Chaetognath phylogenomics: a protostome with deuterostome-like development. *Curr Biol.* 16:R577–R578.
- Matus DQ, Copley RR, Dunn CW, Hejnol A, Eccleston H, Halanych KM, Martindale MQ, Telford MJ. 2006. Broad taxon and gene sampling indicate that chaetognaths are protostomes. *Curr Biol.* 16:R575–R576.
- Mayer G. 2006a. Origin and differentiation of nephridia in the Onychophora provide no support for the Articulata. *Zoomorphology.* 125:1–12.
- Mayer G. 2006b. Structure and development of onychophoran eyes—what is the ancestral visual organ in arthropods? *Arthropod Struct Dev.* 35:231–245.
- Mayer G, Ruhberg H, Bartolomaeus T. 2004. When an epithelium ceases to exist—an ultrastructural study on the fate of the embryonic coelom in *Epiperipatus biolleyi* (Onychophora: Peripatidae). *Acta Zool.* 85:163–170.
- Medina M, Collins AG, Takaoka TL, Kuehl JV, Boore JL. 2006. Naked corals: skeleton loss in scleractinia. *Proc Natl Acad Sci U S A.* 103:9096–9100.
- Monge-Najera J. 1995. Phylogeny, biogeography and reproductive trends in the Onychophora. *Zool J Linn Soc.* 114:21–60.
- Nielsen C. 1998. The phylogenetic position of the Arthropoda. In: Fortey RA, Thomas RH, editors. *Arthropod relationships*. London: Chapman & Hall. p. 11–22.
- Nielsen C. 2001. Animal evolution: interrelationships of the living phyla. Oxford: Oxford University Press.
- Papillon D, Perez Y, Caubit X, Le Parco Y. 2004. Identification of chaetognaths as protostomes is supported by the analysis of their mitochondrial genome. *Mol Biol Evol.* 21:2122–2129.
- Park JK, Rho HS, Kristensen RM, Kim W, Giribet G. 2006. First molecular data on the phylum loricifera: an investigation into the phylogeny of ecdysozoa with emphasis on the positions of loricifera and priapulida. *Zool Sci.* 23:943–954.
- Philippe H, Lartillot N, Brinkmann H. 2005. Multigene analyses of bilaterian animals corroborate the monophyly of ecdysozoa, lophotrochozoa, and protostomia. *Mol Biol Evol.* 22:1246–1253.
- Pilato G, Binda MG, Biondi O, et al. (13 co-authors). 2005. The clade ecdysozoa, perplexities and questions. *Zool Anz.* 244:43–50.
- Podsiadlowski L, Bartolomaeus T. 2005. Organization of the mitochondrial genome of mantis shrimp *Pseudosquilla ciliata* (crustacea: stomatopoda). *Mar Biotechnol.* 7:618–624.
- Pont-Kingdon G, Okada NA, Macfarlane JL, Beagley CT, Watkins-Sims CD, Cavalier-Smith T, Clark-Walker GD, Wolstenholme DR. 1998. Mitochondrial DNA of the coral *Sarcophyton glaucum* contains a gene for a homologue of bacterial MutS: a possible case of gene transfer from the nucleus to the mitochondrion. *J Mol Evol.* 46:419–431.
- Ramsköld L, Chen YJ. 1998. Cambrian lobopodians: morphology and phylogeny. In: Edgecombe GD, editor. *Arthropod fossils and phylogeny*. New York: Cambridge University Press. p. 107–150.
- Regier JC, Shultz JW, Kambic RE. 2005. Pancrustacean phylogeny: hexapods are terrestrial crustaceans and maxillopods are not monophyletic. *Proc R Soc Lond B Biol Sci.* 272:395–401.
- Reid AL. 1996. Review of the peripatopsidae (Onychophora) in Australia, with comments on peripatopsid relationships. *Invertebr Taxon.* 10:663–936.
- Ruiz-Trillo I, Paps J, Loukota M, Ribera C, Jondelius U, Baguna J, Riutort M. 2002. A phylogenetic analysis of myosin heavy chain type II sequences corroborates that acocela and nemertodermatida are basal bilaterians. *Proc Natl Acad Sci U S A.* 99:11246–11251.
- Schmidt-Rhaesa A. 2006. Perplexities concerning the ecdysozoa: a reply to Pilato et al. *Zool Anz.* 244:205–208.
- Scholtz G. 2002. The Articulata hypothesis - or what is a segment. *Org Divers Evol.* 2:197–215.
- Snodgrass RE. 1938. Evolution of Annelida, Onychophora and Arthropoda. *Smithson Misc Collect.* 97:1–77.
- Staton JL, Daehler LL, Brown WM. 1997. Mitochondrial gene arrangement of the horseshoe crab *Limulus polyphemus* L.: conservation of major features among arthropod classes. *Mol Biol Evol.* 14:867–874.
- Storch V, Ruhberg H. 1993. Onychophora. In: Harrison FW, Rice ME, editors. *Microscopic anatomy of invertebrates*. Vol. 12. New York: Wiley-Liss. p. 11–56.
- Strausfeld NJ, Strausfeld CM, Loesel R, Rowell D, Stowe S. 2006. Arthropod phylogeny: onychophoran brain organization suggests an archaic relationship with a chelicerate stem lineage. *Proc R Soc Lond B Biol Sci.* 273:1857–1866.
- Swofford DL. 1993. Paup—A computer-program for phylogenetic inference using maximum parsimony. *J Gen Physiol.* 102:A9.

- Telford MJ, Lockyer AE, Cartwright-Finch C, Littlewood DTJ. 2003. Combined large and small subunit ribosomal RNA phylogenies support a basal position of the acoelomorph flatworms. *Proc R Soc Lond B Biol Sci.* 270:1077–1083.
- Thompson JD, Higgins DG, Gibson TJ. 1994. Clustal-W—improving the sensitivity of progressive multiple sequence alignment through sequence weighting, position-specific gap penalties and weight matrix choice. *Nucleic Acids Res.* 22:4673–4680.
- Trewick SA. 2000. Mitochondrial DNA sequences support allozyme evidence for cryptic radiation of New Zealand *Peripatooides* (Onychophora). *Mol Ecol.* 9:269–281.
- Valles Y, Boore JL. 2006. Lophotrochozoan mitochondrial genomes. *Integr Comp Biol.* 46:544–557.
- Vitkova M, Kral J, Traut W, Zrzavy J, Marec F. 2005. The evolutionary origin of insect telomeric repeats, (TTAGG)<sub>n</sub>. *Chromosome Res.* 13:145–156.
- Waeschenbach A, Telford MJ, Porter JS, Littlewood DTJ. 2006. The complete mitochondrial genome of *Flustrellidra hispida* and the phylogenetic position of bryozoa among the metazoa. *Mol Phylogenet Evol.* 40:195–207.
- Webster BL, Copley RR, Jenner RA, Kenzie-Dodds JA, Bourtat SJ, Rota-Stabelli O, Littlewood DTJ, Telford MJ. 2006. Mitogenomics and phylogenomics reveal priapulid worms as extant models of the ancestral Ecdysozoa. *Evol Dev.* 8:502–510.
- Webster BL, Kenzie-Dodds JA, Telford MJ, Littlewood DTJ. 2007. The mitochondrial genome of *Priapulidus caudatus* Lamarck (Priapulida: Priapulidae). *Gene.* 389:96–105.
- Whittington HB. 1978. Lobopod animal Aysheaia-pedunculata Walcott, Middle Cambrian, Burgess Shale, British-Columbia. *Philos Trans R Soc Lond B Biol Sci.* 284:165.
- Yamauchi MM, Miya MU, Machida RJ, Nishida M. 2004. PCR-based approach for sequencing mitochondrial genomes of decapod crustaceans, with a practical example from kuruma prawn (*Marsupenaeus japonicus*). *Mar Biotechnol.* 6:419–429.

William Jeffery, Associate Editor

Accepted October 8, 2007
